# Supplementary material for: Nisin Mutant Prevention Concentration and the Role of Subinhibitory Concentrations on Resistance Development by Diabetic Foot Staphylococci
Source: MDPI journal article supplement (doi:10.3390/antibiotics11070972), 2022-07-19
Supplement: s1 [file s1]

**Supplementary Data S1.** Tables containing the annotated variant calling outputs for each pair of samples (1Vs1) using as references ENSEMBL *S. aureus* strain Newman (genome assembly: ASM1046v1) and *S. aureus* strain ATCC 29213 (genome assembly: ASM126771v2). The mutations found in intergenic regions were removed (“upstream\_gene\_variant” and “downstream\_gene\_variant”), keeping “gene mutations” events.

Uploaded\_variation: organized as “Chromosome”\_ “Chromosome start position”\_ “Allele”; Location: chromosome start/end coordinates in the formats “Chromosome”：“start” or “Chromosome”：“start”-“end”; Allele: The list of alternative alleles at this position; Gene : Ensembl ID of the affected gene; Feature: Ensembl ID of the feature; Feature\_type : annotated feature type. Could be a transcript (“Transcript”), a regulatory feature (“RegulatoryFeature”) or a motif (“MotifFeature”); Consequence: consequence type of the mutation (detailed in **Supplementary Table S1**); cDNA\_position: relative position of the mutation in the cDNA sequence; CDS\_position: relative position of the mutation in coding sequence; Protein\_position: relative position of the amino acid in the protein. Amino\_acids: only given if the variant affects the protein-coding sequence; Codons: the alternative codons with the variant base in upper case; QUALIFIER: Defines the relationship between Gene product and GO term; GO.TERM: Unique, stable identifier of the gene ontology term; GO.NAME: Gene ontology name; GENE\_PRODUCT\_NAME: Name of the gene product.

**Supplementary Table S1.** Description of the terms defined by the “Consequence” column in Supplementary Data S1 tables.

**Supplementary Table S2.** Chromosome ("CHROM"), start position ("POS"), reference base(s) at the given position on the *S. aureus* strain Newman reference sequence ("REF"), mutated sequences ("ALT"), number of reads covering the mutations across samples ("DP") and fraction of the reads that contain the specific mutation across samples ("DP\_Frac").
